# Supplementary material for: New fluorescent sensor for Cu2+ and S2− in 100% aqueous solution based on displacement approach
Source: Royal Society of Chemistry journal article supplement (doi:10.1039/c3dt53281j), 2014-01-01
Supplement: c3dt53281j.pdf [file c3dt53281j.pdf]

## Supporting Information

# New fluorescent sensor for $\text{Cu}^{2+}$ and $\text{S}^{2-}$ in 100% aqueous solution based on displacement approach

Yan Fu,<sup>a</sup> Qing-Chuan Feng,<sup>b</sup> Xiu-Juan Jiang,<sup>a</sup> Hong Xu,<sup>a</sup> Min Li,<sup>a</sup> and Shuang-Quan Zang<sup>a\*</sup>

<sup>a</sup> College of Chemistry and Molecular Engineering, Zhengzhou University, Zhengzhou, 450001, P. R. China

<sup>b</sup> Department of Cell Biology and Medical Genetics, Basic Medical College of Zhengzhou University, Zhengzhou 450001, P. R. China

Author for correspondence: Dr. S.-Q. Zang, E-mail: [zangsqzg@zzu.edu.cn](mailto:zangsqzg@zzu.edu.cn).

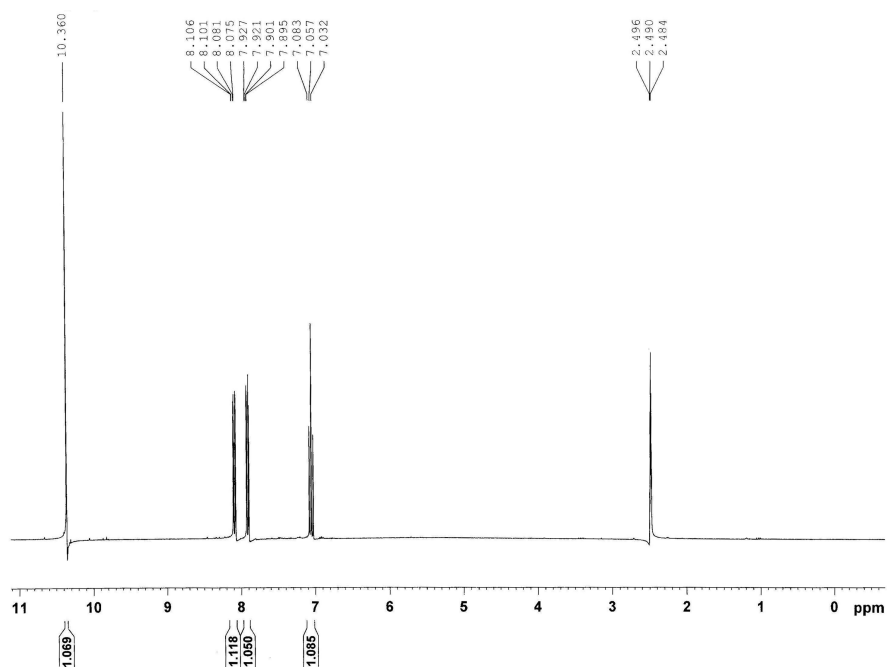

Fig. S1. <sup>1</sup>H NMR spectra of 3-formyl-2-hydroxy benzoic acid (400 MHz, DMSO-*d*<sub>6</sub>).

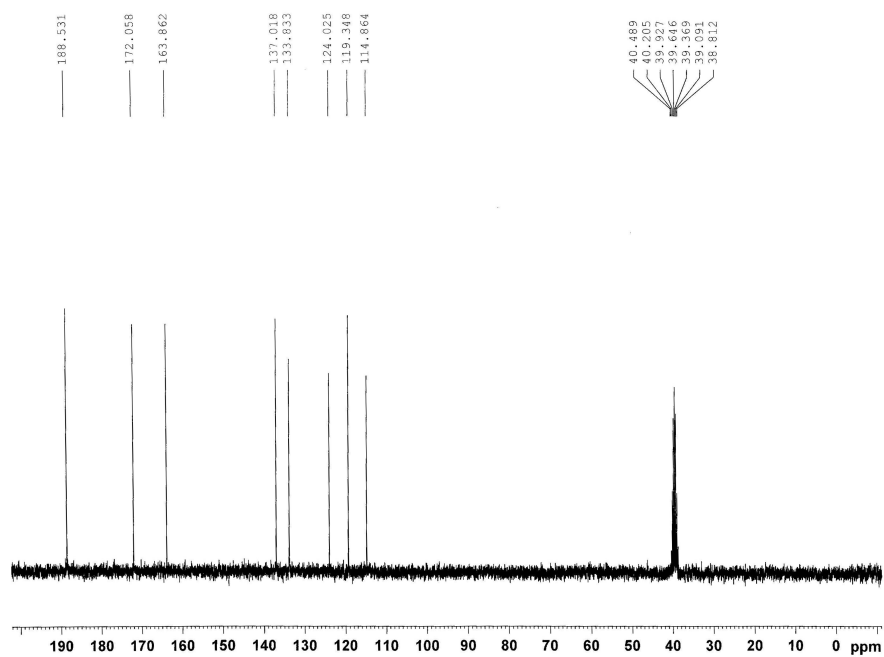

Fig. S2.  $^{13}\text{C}$  NMR spectra of 3-formyl-2-hydroxy benzoic acid (400 MHz,  $\text{DMSO-}d_6$ ).

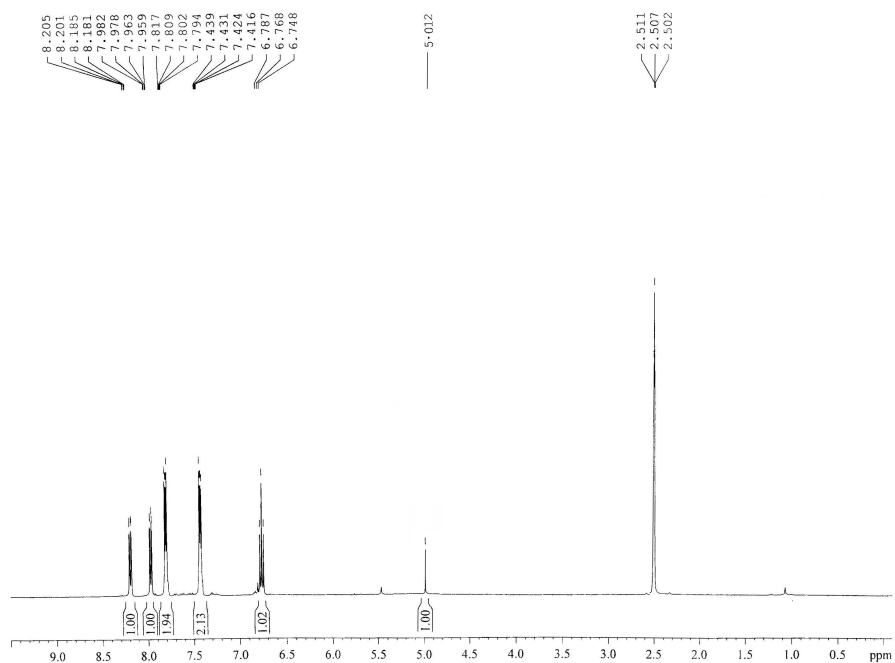

Fig. S3.  $^1\text{H}$  NMR spectra of HL (400 MHz,  $\text{DMSO-}d_6$ ).

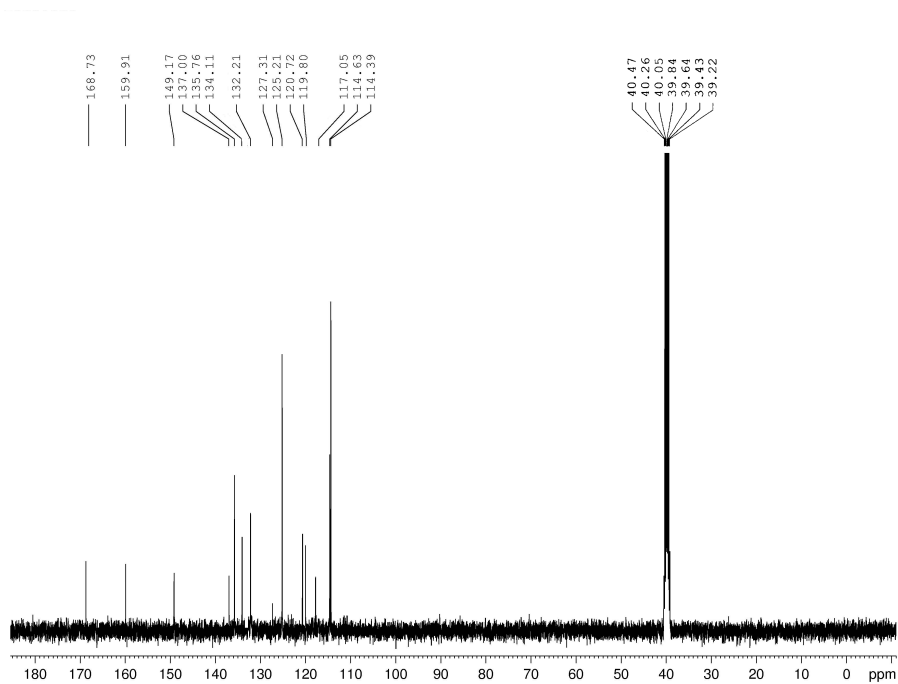

Fig. S4.  $^{13}\text{C}$  NMR spectra of HL (400 MHz,  $\text{DMSO-}d_6$ ).

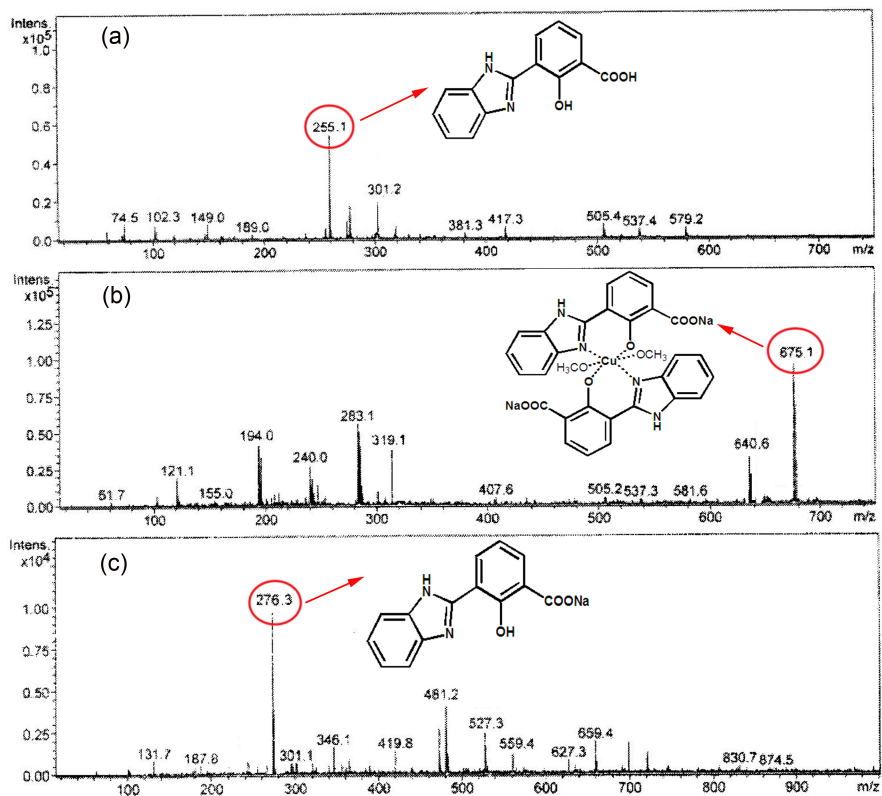

Fig. S5. ESI-MS spectrum of  $\text{H}_2\text{L}$  (a),  $\text{L-Cu}$  (b),  $\text{L-Cu} + \text{S}^{2-}$  (c).

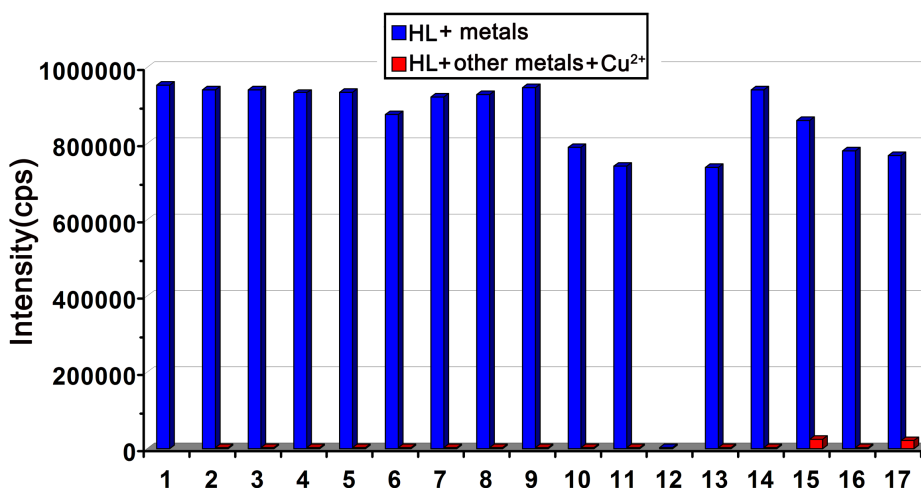

**Fig. S6.** Fluorescence responses of **HL** (5  $\mu\text{M}$ ) to various cations in aqueous solution HEPES-buffer (20 mM, pH 7.4). The blue bars represent the emission intensities of **HL** in the presence of cations of interest (50  $\mu\text{M}$ ). The red bars represent the change of the emission that occurs upon the subsequent addition of  $\text{Cu}^{2+}$  to the above solution. ( $\lambda_{\text{ex}} = 243 \text{ nm}$ ,  $\lambda_{\text{em}} = 436 \text{ nm}$ ). 1. **HL**, 2.  $\text{Na}^+$ , 3.  $\text{K}^+$ , 4.  $\text{Mg}^{2+}$ , 5.  $\text{Ca}^{2+}$ , 6.  $\text{Zn}^{2+}$ , 7.  $\text{Cd}^{2+}$ , 8.  $\text{Mn}^{2+}$ , 9.  $\text{Co}^{2+}$ , 10.  $\text{Ni}^{2+}$ , 11.  $\text{Fe}^{2+}$ , 12.  $\text{Cu}^{2+}$ , 13.  $\text{Al}^{3+}$ , 14.  $\text{Ba}^{2+}$ , 15.  $\text{Ag}^+$ , 16.  $\text{Hg}^{2+}$ , 17.  $\text{Pb}^{2+}$ .

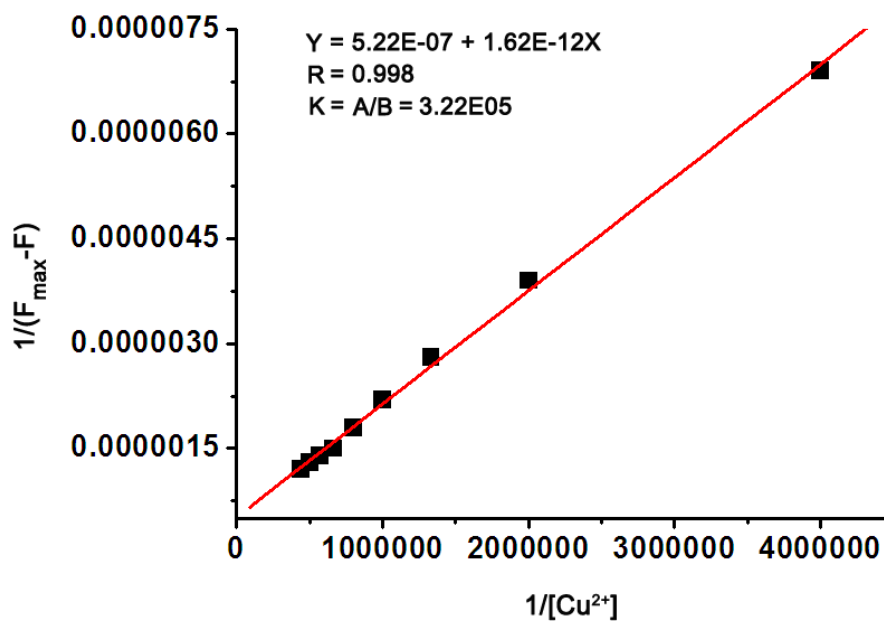

**Fig. S7.** Benesi-Hildebrand plot for L-Cu.

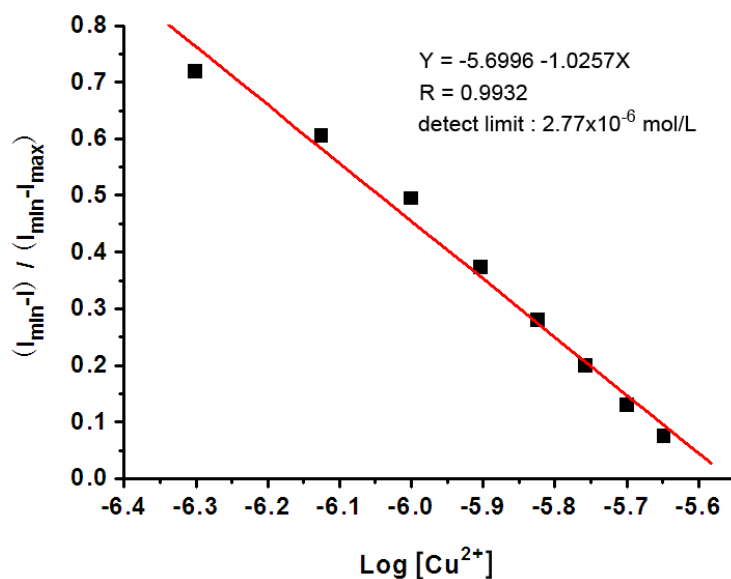

**Fig. S8.** The limit of detection (LOD) of **HL** for  $\text{Cu}^{2+}$ : fluorescence responses ( $\lambda_{\text{em}} = 436 \text{ nm}$ ) as a function of  $\text{Cu}^{2+}$  concentration. The solid line represents a linear fit to the experimental data. The detection limit for  $\text{Cu}^{2+}$  was determined to be  $2.77 \times 10^{-6} \text{ M}$ .

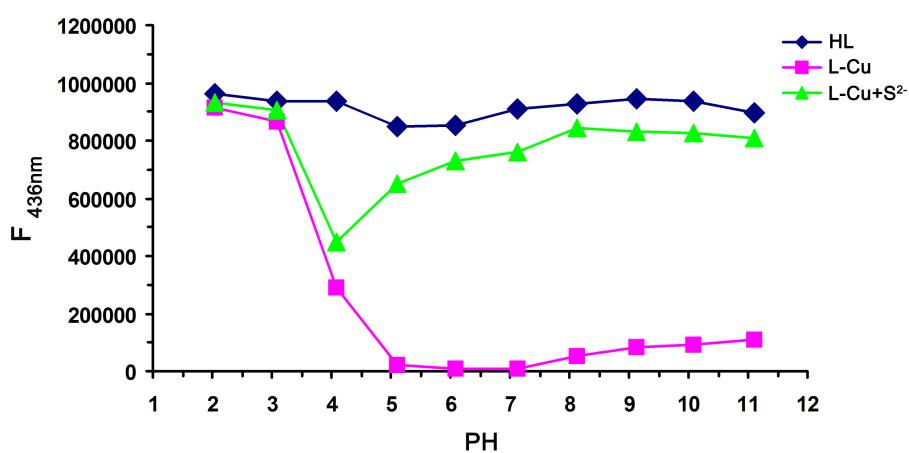

**Fig. S9.** The pH effects on the fluorescence intensity at 436 nm of the compound **HL** ( $5 \mu\text{M}$ ) ( $\blacklozenge$ ), the **L-Cu** ensemble ( $5 \mu\text{M}$ ) ( $\blacksquare$ ), and the ensemble ( $5 \mu\text{M}$ ) toward  $\text{S}^{2-}$  ( $10 \mu\text{M}$ ) ( $\blacktriangle$ ).

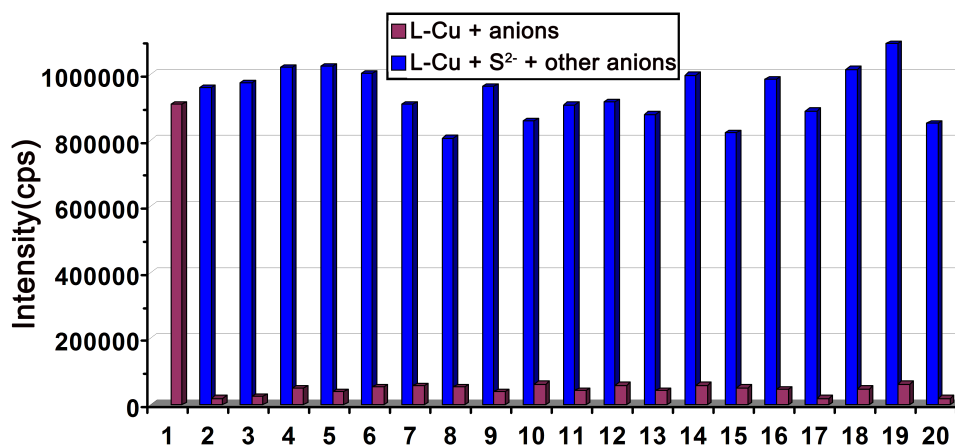

**Fig. S10.** Fluorescence responses of the L-Cu ensemble (5  $\mu\text{M}$ ) to various anions in aqueous solution HEPES-buffer (20 mM, pH 7.4). The violet bars represented the emission intensities of L-Cu in the presence of different anions (500  $\mu\text{M}$ ). The blue bars represented the subsequent addition of  $\text{S}^{2-}$  to the above solution. ( $\lambda_{\text{ex}} = 243 \text{ nm}$ ,  $\lambda_{\text{em}} = 436 \text{ nm}$ ). 1.  $\text{S}^{2-}$ , 2.  $\text{F}^-$ , 3.  $\text{Cl}^-$ , 4.  $\text{Br}^-$ , 5.  $\text{I}^-$ , 6.  $\text{SO}_3^{2-}$ , 7.  $\text{NO}_3^-$ , 8.  $\text{NO}_2^-$ , 9.  $\text{SO}_4^{2-}$ , 10.  $\text{CO}_3^{2-}$ , 11.  $\text{H}_2\text{PO}_4^-$ , 12.  $\text{ClO}_4^-$ , 13.  $\text{AcO}^-$ , 14.  $\text{PO}_4^{3-}$ , 15.  $\text{N}_3^-$ , 16.  $\text{HSO}_4^-$ , 17.  $\text{HS}^-$ , 18.  $\text{HSO}_3^-$ , 19.  $\text{SCN}^-$ , 20.  $\text{S}_2\text{O}_5^{2-}$ .

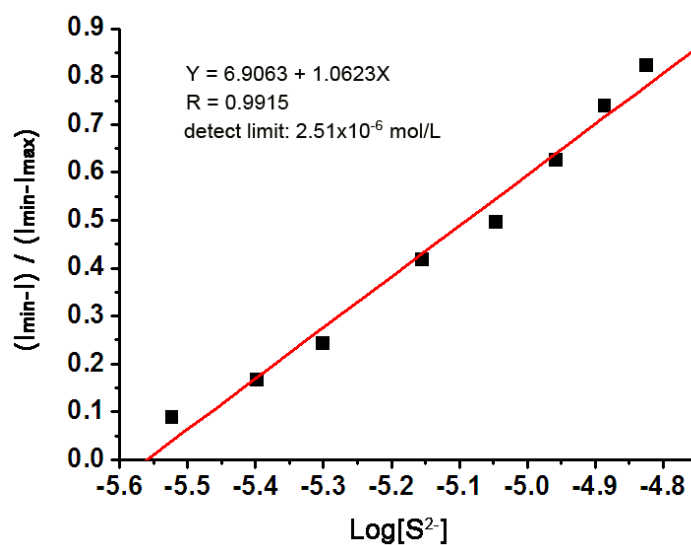

**Fig. S11.** The limit of detection (LOD) of L-Cu for  $\text{S}^{2-}$  was determined to be  $2.51 \times 10^{-6} \text{ M}$ .

**Table S1.** Fluorescence lifetime decay parameters of HL, L-Cu ensemble and L-Cu +  $\text{S}^{2-}$ .

| Samples              | $B_1$  | $T_1/ns$ | $B_2$  | $T_2/ns$ | $\langle T \rangle/ns$ | $\chi^2$ |
|----------------------|--------|----------|--------|----------|------------------------|----------|
| HL                   | 4.9273 | 4.05452  |        |          |                        | 1.1185   |
| L-Cu                 | 3.4177 | 2.0073   | 1.8380 | 6.2557   | 3.4930                 | 1.1096   |
| L-Cu+S <sup>2-</sup> | 4.7801 | 4.0494   |        |          |                        | 1.0637   |
